# Supplementary material
Source: PubMed Central journal article supplement (PMC7038535)
Supplement: NIHMS1553099-supplement-1.pdf [file NIHMS1553099-supplement-1.pdf]

SUPPLEMENTAL MATERIAL

Table S1. Coarsened Exact Matching (CEM) BLL ≤ 10 Sample: Effects of BLL on Test Score Percentile and Changes in BLL Effects by Grade.

|               | Math<br>CEM BLL ≤ 10<br>(1) | Reading<br>CEM BLL ≤ 10<br>(2) | Math<br>CEM BLL ≤ 10<br>(3) | Reading<br>CEM BLL ≤ 10<br>(4) |
|---------------|-----------------------------|--------------------------------|-----------------------------|--------------------------------|
| BLL 2         | -0.38*<br>(0.19)            | -0.55**<br>(0.19)              | -0.53*<br>(0.22)            | -0.65**<br>(0.22)              |
| BLL 2 × grade |                             |                                | 0.06<br>(0.07)              | 0.04<br>(0.07)                 |
| BLL 3         | -0.57**<br>(0.20)           | -1.03***<br>(0.20)             | -0.56*<br>(0.23)            | -0.94***<br>(0.24)             |
| BLL 3 × grade |                             |                                | -0.01<br>(0.07)             | -0.04<br>(0.07)                |
| BLL 4         | -0.93***<br>(0.22)          | -1.26***<br>(0.22)             | -0.85**<br>(0.28)           | -1.07***<br>(0.28)             |
| BLL 4 × grade |                             |                                | -0.04<br>(0.08)             | -0.08<br>(0.08)                |
| BLL 5         | -0.71**<br>(0.26)           | -1.10***<br>(0.27)             | -0.80*<br>(0.35)            | -1.38***<br>(0.35)             |
| BLL 5 × grade |                             |                                | 0.03<br>(0.10)              | 0.11<br>(0.10)                 |
| BLL 6         | -1.62***<br>(0.34)          | -2.25***<br>(0.34)             | -1.08*<br>(0.46)            | -2.19***<br>(0.47)             |
| BLL 6 × grade |                             |                                | -0.20<br>(0.13)             | -0.02<br>(0.13)                |
| BLL 7         | -0.96*<br>(0.43)            | -1.42**<br>(0.43)              | -0.56<br>(0.61)             | -1.10<br>(0.60)                |
| BLL 7 × grade |                             |                                | -0.15<br>(0.17)             | -0.12<br>(0.16)                |

|                    |                     |                    |                     |                    |
|--------------------|---------------------|--------------------|---------------------|--------------------|
| BLL 8              | -1.72**<br>(0.54)   | -1.99***<br>(0.55) | -2.26**<br>(0.77)   | -2.33**<br>(0.78)  |
| BLL 8 × grade      |                     |                    | 0.20<br>(0.21)      | 0.13<br>(0.21)     |
| BLL 9              | -1.29<br>(0.70)     | -2.10**<br>(0.73)  | -0.64<br>(1.00)     | -2.01<br>(1.06)    |
| BLL 9 × grade      |                     |                    | -0.22<br>(0.25)     | -0.02<br>(0.27)    |
| BLL 10             | -2.59*<br>(1.31)    | -3.96**<br>(1.29)  | -2.42<br>(2.11)     | -4.50*<br>(2.18)   |
| BLL 10 × grade     |                     |                    | -0.05<br>(0.49)     | 0.20<br>(0.52)     |
| Male               | 1.17***<br>(0.13)   | -2.41***<br>(0.13) | 2.38***<br>(0.17)   | -2.58***<br>(0.17) |
| Male × grade       |                     |                    | -0.49***<br>(0.05)  | 0.07<br>(0.05)     |
| White              | 2.67***<br>(0.34)   | 4.35***<br>(0.34)  | 3.66***<br>(0.45)   | 5.68***<br>(0.45)  |
| White × grade      |                     |                    | -0.42**<br>(0.15)   | -0.63***<br>(0.15) |
| Black              | -11.57***<br>(0.38) | -9.85***<br>(0.38) | -10.73***<br>(0.52) | -7.34***<br>(0.52) |
| Black × grade      |                     |                    | -0.37*<br>(0.18)    | -1.08***<br>(0.17) |
| EconDisadv         | -6.07***<br>(0.26)  | -6.49***<br>(0.27) | -5.85***<br>(0.42)  | -6.42***<br>(0.42) |
| EconDisadv × grade |                     |                    | -0.07<br>(0.12)     | -0.01<br>(0.12)    |
| Medicaid           | -1.40***<br>(0.28)  | -1.48***<br>(0.29) | -1.59***<br>(0.42)  | -1.78***<br>(0.42) |

|                                  |                     |                    |                    |                    |
|----------------------------------|---------------------|--------------------|--------------------|--------------------|
| Medicaid × grade                 |                     |                    | 0.02<br>(0.13)     | 0.08<br>(0.13)     |
| Not Married                      | -0.86**<br>(0.30)   | -0.28<br>(0.30)    | -1.57***<br>(0.43) | -0.29<br>(0.42)    |
| Not Married × grade              |                     |                    | 0.28*<br>(0.14)    | -0.00<br>(0.14)    |
| Used Alcohol                     | -0.14<br>(0.74)     | 1.01<br>(0.71)     | 0.31<br>(0.96)     | 1.31<br>(0.94)     |
| Used Alcohol × grade             |                     |                    | -0.17<br>(0.26)    | -0.11<br>(0.25)    |
| Smoked                           | -2.97***<br>(0.22)  | -2.22***<br>(0.22) | -2.04***<br>(0.29) | -2.37***<br>(0.30) |
| Smoked × grade                   |                     |                    | -0.37***<br>(0.08) | 0.05<br>(0.08)     |
| Age in 3rd Grade                 | -10.53***<br>(0.18) | -9.34***<br>(0.18) | -9.40***<br>(0.21) | -8.43***<br>(0.21) |
| Age in 3rd Grade × grade         |                     |                    | -0.46***<br>(0.05) | -0.38***<br>(0.05) |
| Mother 21-29 years               | -1.76***<br>(0.30)  | -2.03***<br>(0.30) | -1.69***<br>(0.43) | -2.28***<br>(0.43) |
| Mother 21-29 years × grade       |                     |                    | -0.02<br>(0.14)    | 0.11<br>(0.14)     |
| Mother 30+ years                 | -0.11<br>(0.34)     | -0.12<br>(0.34)    | -0.50<br>(0.49)    | -0.73<br>(0.48)    |
| Mother 30+ years × grade         |                     |                    | 0.16<br>(0.15)     | 0.24<br>(0.15)     |
| Parents some high school         | -0.14<br>(0.49)     | 2.32***<br>(0.48)  | 0.93<br>(0.61)     | 3.16***<br>(0.59)  |
| Parents some high school × grade |                     |                    | -0.54*<br>(0.23)   | -0.46*<br>(0.22)   |

|                                  |                    |                    |                    |                    |
|----------------------------------|--------------------|--------------------|--------------------|--------------------|
| Parents high school grad         | 3.19***<br>(0.50)  | 6.43***<br>(0.50)  | 4.17***<br>(0.64)  | 7.75***<br>(0.63)  |
| Parents high school grad × grade |                    |                    | -0.51*<br>(0.24)   | -0.69**<br>(0.23)  |
| Parents some college             | 8.35***<br>(0.54)  | 11.87***<br>(0.54) | 8.42***<br>(0.70)  | 12.64***<br>(0.69) |
| Parents some college × grade     |                    |                    | -0.20<br>(0.25)    | -0.50*<br>(0.25)   |
| Parents college grad             | 18.62***<br>(0.55) | 21.58***<br>(0.55) | 18.19***<br>(0.71) | 22.03***<br>(0.71) |
| Parents college grad × grade     |                    |                    | -0.00<br>(0.26)    | -0.38<br>(0.25)    |
| February Birthdate               | -0.44<br>(0.33)    | -0.35<br>(0.33)    | -0.43<br>(0.33)    | -0.35<br>(0.33)    |
| March Birthdate                  | -0.73*<br>(0.32)   | -1.09***<br>(0.32) | -0.72*<br>(0.32)   | -1.09***<br>(0.32) |
| April Birthdate                  | -1.87***<br>(0.32) | -1.82***<br>(0.32) | -1.86***<br>(0.32) | -1.82***<br>(0.32) |
| May Birthdate                    | -1.16***<br>(0.32) | -1.49***<br>(0.32) | -1.16***<br>(0.32) | -1.49***<br>(0.32) |
| June Birthdate                   | -1.53***<br>(0.32) | -1.96***<br>(0.32) | -1.52***<br>(0.32) | -1.97***<br>(0.32) |
| July Birthdate                   | -1.42***<br>(0.32) | -2.19***<br>(0.32) | -1.41***<br>(0.32) | -2.19***<br>(0.32) |
| August Birthdate                 | -0.81**<br>(0.32)  | -1.66***<br>(0.32) | -0.81*<br>(0.32)   | -1.65***<br>(0.32) |
| September Birthdate              | 0.22<br>(0.32)     | -0.66*<br>(0.32)   | 0.22<br>(0.32)     | -0.66*<br>(0.32)   |
| October Birthdate                | 5.86***<br>(0.34)  | 4.97***<br>(0.34)  | 5.87***<br>(0.34)  | 4.97***<br>(0.34)  |

|                    |                     |                     |                     |                     |
|--------------------|---------------------|---------------------|---------------------|---------------------|
| November Birthdate | 11.25***<br>(0.37)  | 10.21***<br>(0.37)  | 11.24***<br>(0.37)  | 10.21***<br>(0.37)  |
| December Birthdate | 11.12***<br>(0.37)  | 9.98***<br>(0.37)   | 11.13***<br>(0.37)  | 9.98***<br>(0.37)   |
| Constant           | 136.76***<br>(1.59) | 124.46***<br>(1.60) | 136.99***<br>(1.59) | 124.97***<br>(1.61) |
| N                  | 450,845             | 450,845             | 450,845             | 450,845             |
| R2                 | 0.424               | 0.402               | 0.424               | 0.402               |

Note: Columns 1 and 2 (3 and 4) are analogous to the model results in Table 2 (Table 3) of the manuscript. The omitted categories for the categorical explanatory variables correspond to BLL = 1, female, all other races/ethnicities, not economically disadvantaged, not on Medicaid, mother married at the time of birth, mother did not use alcohol during pregnancy, mother did not smoke during pregnancy, mother less than 21 years old at the time of birth, and parents had no high school education as of the time of child's birth. All estimates are from regression models that include school-grade-year dummy variables. Robust standard errors clustered at the student level are presented in parentheses. \*\*\* indicates the corresponding coefficient is significantly different from zero at the 0.1% level; \*\* indicates the corresponding coefficient is significantly different from zero at the 1% level; and \* indicates the corresponding coefficient is significantly different from zero at the 5% level.

*Table S2: Effects of BLL on Test Scores: Regression Results using maximum and most recent BLL measures instead of geometric mean. (Analogous to columns 1 and 4 in Table 2 of manuscript.).*

|        | <u>Math Percentile</u>               |                                       | <u>Reading Percentile</u>            |                                       |
|--------|--------------------------------------|---------------------------------------|--------------------------------------|---------------------------------------|
|        | Full BLL $\leq$ 10<br>Max BLL<br>(1) | Full BLL $\leq$ 10<br>Last BLL<br>(2) | Full BLL $\leq$ 10<br>Max BLL<br>(3) | Full BLL $\leq$ 10<br>Last BLL<br>(4) |
| BLL 2  | -0.27*<br>(0.13)                     | -0.19<br>(0.11)                       | -0.39**<br>(0.13)                    | -0.35**<br>(0.11)                     |
| BLL 3  | -0.39**<br>(0.12)                    | -0.40***<br>(0.11)                    | -0.62***<br>(0.12)                   | -0.68***<br>(0.11)                    |
| BLL 4  | -0.68***<br>(0.13)                   | -0.72***<br>(0.11)                    | -1.00***<br>(0.13)                   | -1.04***<br>(0.11)                    |
| BLL 5  | -0.93***<br>(0.13)                   | -1.02***<br>(0.12)                    | -1.34***<br>(0.13)                   | -1.47***<br>(0.13)                    |
| BLL 6  | -1.02***<br>(0.15)                   | -1.11***<br>(0.14)                    | -1.54***<br>(0.15)                   | -1.64***<br>(0.14)                    |
| BLL 7  | -1.15***<br>(0.16)                   | -1.15***<br>(0.17)                    | -1.70***<br>(0.16)                   | -1.88***<br>(0.17)                    |
| BLL 8  | -1.50***<br>(0.18)                   | -1.54***<br>(0.20)                    | -2.05***<br>(0.18)                   | -2.01***<br>(0.20)                    |
| BLL 9  | -1.33***<br>(0.21)                   | -1.45***<br>(0.24)                    | -2.16***<br>(0.21)                   | -2.34***<br>(0.24)                    |
| BLL 10 | -1.74***<br>(0.26)                   | -2.15***<br>(0.39)                    | -2.42***<br>(0.26)                   | -2.88***<br>(0.39)                    |
| Male   | 0.93***<br>(0.06)                    | 0.93***<br>(0.06)                     | -2.66***<br>(0.06)                   | -2.65***<br>(0.06)                    |
| White  | 2.53***<br>(0.11)                    | 2.54***<br>(0.11)                     | 5.48***<br>(0.11)                    | 5.50***<br>(0.11)                     |

|                          |                     |                     |                     |                     |
|--------------------------|---------------------|---------------------|---------------------|---------------------|
| Black                    | -10.53***<br>(0.11) | -10.51***<br>(0.11) | -7.51***<br>(0.11)  | -7.49***<br>(0.11)  |
| EconDisadv               | -5.20***<br>(0.07)  | -5.21***<br>(0.07)  | -5.90***<br>(0.07)  | -5.90***<br>(0.07)  |
| Medicaid                 | -1.53***<br>(0.08)  | -1.61***<br>(0.08)  | -1.25***<br>(0.08)  | -1.36***<br>(0.08)  |
| Not Married              | -1.05***<br>(0.08)  | -1.05***<br>(0.08)  | -0.40***<br>(0.08)  | -0.40***<br>(0.08)  |
| Used Alcohol             | 0.58*<br>(0.27)     | 0.57*<br>(0.27)     | 0.80**<br>(0.27)    | 0.80**<br>(0.27)    |
| Smoked                   | -2.06***<br>(0.08)  | -2.05***<br>(0.08)  | -1.33***<br>(0.08)  | -1.33***<br>(0.08)  |
| Age in 3rd Grade         | -12.43***<br>(0.06) | -12.43***<br>(0.06) | -11.68***<br>(0.07) | -11.68***<br>(0.07) |
| Mother 21-29 years       | -1.17***<br>(0.08)  | -1.17***<br>(0.08)  | -1.57***<br>(0.08)  | -1.57***<br>(0.08)  |
| Mother 30+ years         | -0.01<br>(0.10)     | -0.01<br>(0.10)     | 0.32**<br>(0.10)    | 0.32**<br>(0.10)    |
| Parents some high school | -0.06<br>(0.16)     | -0.05<br>(0.16)     | 1.71***<br>(0.16)   | 1.72***<br>(0.16)   |
| Parents high school grad | 2.76***<br>(0.16)   | 2.77***<br>(0.16)   | 4.99***<br>(0.16)   | 5.01***<br>(0.16)   |
| Parents some college     | 7.39***<br>(0.17)   | 7.40***<br>(0.17)   | 9.83***<br>(0.17)   | 9.85***<br>(0.17)   |
| Parents college grad     | 17.10***<br>(0.19)  | 17.11***<br>(0.19)  | 18.91***<br>(0.19)  | 18.92***<br>(0.19)  |
| February Birthdate       | -0.68***<br>(0.15)  | -0.68***<br>(0.15)  | -0.79***<br>(0.15)  | -0.79***<br>(0.15)  |
| March Birthdate          | -0.72***<br>(0.15)  | -0.72***<br>(0.15)  | -1.12***<br>(0.15)  | -1.12***<br>(0.15)  |
| April Birthdate          | -1.30***<br>(0.15)  | -1.29***<br>(0.15)  | -1.64***<br>(0.15)  | -1.63***<br>(0.15)  |

|                     |           |           |           |           |
|---------------------|-----------|-----------|-----------|-----------|
|                     | (0.15)    | (0.15)    | (0.15)    | (0.15)    |
| May Birthdate       | -1.28***  | -1.28***  | -1.86***  | -1.86***  |
|                     | (0.14)    | (0.14)    | (0.15)    | (0.15)    |
| June Birthdate      | -1.37***  | -1.37***  | -2.04***  | -2.04***  |
|                     | (0.14)    | (0.14)    | (0.14)    | (0.14)    |
| July Birthdate      | -1.48***  | -1.48***  | -2.21***  | -2.21***  |
|                     | (0.14)    | (0.14)    | (0.14)    | (0.14)    |
| August Birthdate    | -1.17***  | -1.17***  | -1.98***  | -1.99***  |
|                     | (0.14)    | (0.14)    | (0.14)    | (0.14)    |
| September Birthdate | -0.77***  | -0.77***  | -1.58***  | -1.58***  |
|                     | (0.14)    | (0.14)    | (0.14)    | (0.14)    |
| October Birthdate   | 6.00***   | 6.00***   | 5.26***   | 5.25***   |
|                     | (0.15)    | (0.15)    | (0.15)    | (0.15)    |
| November Birthdate  | 12.96***  | 12.95***  | 12.28***  | 12.28***  |
|                     | (0.16)    | (0.16)    | (0.16)    | (0.16)    |
| December Birthdate  | 12.69***  | 12.69***  | 11.96***  | 11.96***  |
|                     | (0.16)    | (0.16)    | (0.16)    | (0.16)    |
| Constant            | 150.85*** | 150.73*** | 142.54*** | 142.42*** |
|                     | (0.57)    | (0.57)    | (0.58)    | (0.58)    |
| <hr/>               |           |           |           |           |
| N                   | 2,344,358 | 2,344,358 | 2,344,358 | 2,344,358 |
| R2                  | 0.344     | 0.344     | 0.322     | 0.322     |

Note: The omitted categories for the categorical explanatory variables correspond to BLL = 1, female, all other races/ethnicities, not economically disadvantaged, not on Medicaid, mother married at the time of birth, mother did not use alcohol during pregnancy, mother did not smoke during pregnancy, mother less than 21 years old at the time of birth, and parents had no high school education as of the time of child's birth. All estimates are from regression models that include school-grade-year dummy variables. Robust standard errors clustered at the student level are presented in parentheses. \*\*\* indicates the corresponding coefficient is significantly different from zero at the 0.1% level; \*\* indicates the corresponding coefficient is significantly different from zero at the 1% level; and \* indicates the corresponding coefficient is significantly different from zero at the 5% level.

Table S3. Changes in BLL Effects on Test Score Percentiles by Grade using maximum and most recent BLL measures instead of geometric mean. (Analogous to columns 1 and 4 in Table 3 of manuscript.)

|                      | <u>Math Percentile</u>               |                                       | <u>Reading Percentile</u>            |                                       |
|----------------------|--------------------------------------|---------------------------------------|--------------------------------------|---------------------------------------|
|                      | Full BLL $\leq$ 10<br>Max BLL<br>(1) | Full BLL $\leq$ 10<br>Last BLL<br>(2) | Full BLL $\leq$ 10<br>Max BLL<br>(3) | Full BLL $\leq$ 10<br>Last BLL<br>(4) |
| BLL 2                | -0.26<br>(0.13)                      | -0.23*<br>(0.11)                      | -0.35**<br>(0.13)                    | -0.39***<br>(0.11)                    |
| BLL 2 $\times$ grade | -0.01<br>(0.04)                      | 0.01<br>(0.03)                        | -0.02<br>(0.04)                      | 0.01<br>(0.03)                        |
| BLL 3                | -0.34**<br>(0.13)                    | -0.41***<br>(0.11)                    | -0.54***<br>(0.13)                   | -0.72***<br>(0.11)                    |
| BLL 3 $\times$ grade | -0.03<br>(0.04)                      | -0.01<br>(0.03)                       | -0.04<br>(0.04)                      | 0.01<br>(0.03)                        |
| BLL 4                | -0.59***<br>(0.13)                   | -0.77***<br>(0.12)                    | -0.92***<br>(0.13)                   | -1.10***<br>(0.12)                    |
| BLL 4 $\times$ grade | -0.05<br>(0.04)                      | 0.01<br>(0.03)                        | -0.05<br>(0.04)                      | 0.02<br>(0.03)                        |
| BLL 5                | -0.83***<br>(0.14)                   | -0.97***<br>(0.13)                    | -1.23***<br>(0.14)                   | -1.44***<br>(0.13)                    |
| BLL 5 $\times$ grade | -0.06<br>(0.04)                      | -0.03<br>(0.04)                       | -0.06<br>(0.04)                      | -0.02<br>(0.04)                       |
| BLL 6                | -0.90***<br>(0.16)                   | -1.06***<br>(0.15)                    | -1.37***<br>(0.16)                   | -1.58***<br>(0.15)                    |
| BLL 6 $\times$ grade | -0.06<br>(0.04)                      | -0.03<br>(0.04)                       | -0.08<br>(0.04)                      | -0.03<br>(0.04)                       |
| BLL 7                | -0.96***<br>(0.18)                   | -1.07***<br>(0.18)                    | -1.46***<br>(0.18)                   | -1.78***<br>(0.18)                    |
| BLL 7 $\times$ grade | -0.10*<br>(0.05)                     | -0.04<br>(0.05)                       | -0.11*<br>(0.05)                     | -0.05<br>(0.05)                       |

|                    |                     |                     |                    |                    |
|--------------------|---------------------|---------------------|--------------------|--------------------|
| BLL 8              | -1.28***<br>(0.20)  | -1.37***<br>(0.22)  | -1.88***<br>(0.20) | -2.07***<br>(0.22) |
| BLL 8 × grade      | -0.11*<br>(0.05)    | -0.08<br>(0.05)     | -0.08<br>(0.05)    | 0.02<br>(0.05)     |
| BLL 9              | -1.20***<br>(0.23)  | -1.34***<br>(0.26)  | -2.03***<br>(0.23) | -2.29***<br>(0.26) |
| BLL 9 × grade      | -0.07<br>(0.06)     | -0.06<br>(0.06)     | -0.06<br>(0.06)    | -0.02<br>(0.06)    |
| BLL 10             | -1.70***<br>(0.30)  | -2.22***<br>(0.45)  | -2.41***<br>(0.29) | -3.06***<br>(0.45) |
| BLL 10 × grade     | -0.03<br>(0.07)     | 0.03<br>(0.10)      | -0.01<br>(0.07)    | 0.08<br>(0.10)     |
| Male               | 2.15***<br>(0.06)   | 2.16***<br>(0.06)   | -2.87***<br>(0.06) | -2.86***<br>(0.06) |
| Male × grade       | -0.57***<br>(0.02)  | -0.57***<br>(0.02)  | 0.10***<br>(0.02)  | 0.10***<br>(0.02)  |
| White              | 3.95***<br>(0.12)   | 3.97***<br>(0.12)   | 6.74***<br>(0.12)  | 6.76***<br>(0.12)  |
| White × grade      | -0.69***<br>(0.04)  | -0.69***<br>(0.04)  | -0.64***<br>(0.04) | -0.64***<br>(0.04) |
| Black              | -10.51***<br>(0.12) | -10.48***<br>(0.12) | -5.93***<br>(0.12) | -5.89***<br>(0.12) |
| Black × grade      | -0.05<br>(0.04)     | -0.05<br>(0.04)     | -0.78***<br>(0.04) | -0.79***<br>(0.04) |
| EconDisadv         | -5.06***<br>(0.09)  | -5.07***<br>(0.09)  | -5.99***<br>(0.09) | -6.00***<br>(0.09) |
| EconDisadv × grade | -0.06*<br>(0.03)    | -0.06*<br>(0.03)    | 0.05<br>(0.03)     | 0.05<br>(0.03)     |
| Medicaid           | -1.71***<br>(0.08)  | -1.77***<br>(0.08)  | -1.44***<br>(0.08) | -1.53***<br>(0.08) |

|                                  |                     |                     |                     |                     |
|----------------------------------|---------------------|---------------------|---------------------|---------------------|
| Medicaid × grade                 | 0.07**<br>(0.02)    | 0.06**<br>(0.02)    | 0.08***<br>(0.02)   | 0.07**<br>(0.02)    |
| Not Married                      | -0.82***<br>(0.08)  | -0.82***<br>(0.08)  | -0.12<br>(0.08)     | -0.11<br>(0.08)     |
| Not Married × grade              | -0.11***<br>(0.02)  | -0.11***<br>(0.02)  | -0.13***<br>(0.02)  | -0.13***<br>(0.02)  |
| Used Alcohol                     | 0.48<br>(0.30)      | 0.48<br>(0.30)      | 0.89**<br>(0.30)    | 0.89**<br>(0.30)    |
| Used Alcohol × grade             | 0.05<br>(0.07)      | 0.05<br>(0.07)      | -0.03<br>(0.07)     | -0.03<br>(0.07)     |
| Smoked                           | -1.37***<br>(0.09)  | -1.37***<br>(0.09)  | -1.16***<br>(0.09)  | -1.15***<br>(0.09)  |
| Smoked × grade                   | -0.32***<br>(0.02)  | -0.32***<br>(0.02)  | -0.08***<br>(0.02)  | -0.09***<br>(0.02)  |
| Age in 3rd Grade                 | -11.55***<br>(0.07) | -11.54***<br>(0.07) | -11.23***<br>(0.07) | -11.22***<br>(0.07) |
| Age in 3rd Grade × grade         | -0.41***<br>(0.02)  | -0.41***<br>(0.02)  | -0.21***<br>(0.02)  | -0.21***<br>(0.02)  |
| Mother 21-29 years               | -1.23***<br>(0.09)  | -1.23***<br>(0.09)  | -1.83***<br>(0.09)  | -1.83***<br>(0.09)  |
| Mother 21-29 years × grade       | 0.03<br>(0.02)      | 0.03<br>(0.02)      | 0.12***<br>(0.02)   | 0.12***<br>(0.02)   |
| Mother 30+ years                 | -0.39***<br>(0.11)  | -0.39***<br>(0.11)  | -0.21<br>(0.11)     | -0.22*<br>(0.11)    |
| Mother 30+ years × grade         | 0.18***<br>(0.03)   | 0.18***<br>(0.03)   | 0.25***<br>(0.03)   | 0.25***<br>(0.03)   |
| Parents some high school         | 0.53**<br>(0.18)    | 0.54**<br>(0.18)    | 2.22***<br>(0.17)   | 2.23***<br>(0.17)   |
| Parents some high school × grade | -0.29***<br>(0.05)  | -0.29***<br>(0.05)  | -0.26***<br>(0.05)  | -0.26***<br>(0.05)  |

|                                  |                    |                    |                    |                    |
|----------------------------------|--------------------|--------------------|--------------------|--------------------|
| Parents high school grad         | 3.29***<br>(0.17)  | 3.30***<br>(0.17)  | 5.49***<br>(0.17)  | 5.51***<br>(0.17)  |
| Parents high school grad × grade | -0.27***<br>(0.05) | -0.27***<br>(0.05) | -0.26***<br>(0.05) | -0.26***<br>(0.05) |
| Parents some college             | 7.71***<br>(0.19)  | 7.72***<br>(0.19)  | 10.02***<br>(0.18) | 10.03***<br>(0.18) |
| Parents some college × grade     | -0.18**<br>(0.05)  | -0.18**<br>(0.05)  | -0.12*<br>(0.05)   | -0.12*<br>(0.05)   |
| Parents college grad             | 16.90***<br>(0.20) | 16.90***<br>(0.20) | 18.86***<br>(0.20) | 18.87***<br>(0.20) |
| Parents college grad × grade     | 0.07<br>(0.06)     | 0.07<br>(0.06)     | -0.02<br>(0.06)    | -0.02<br>(0.06)    |
| February Birthdate               | -0.67***<br>(0.15) | -0.67***<br>(0.15) | -0.79***<br>(0.15) | -0.79***<br>(0.15) |
| March Birthdate                  | -0.71***<br>(0.15) | -0.71***<br>(0.15) | -1.12***<br>(0.15) | -1.12***<br>(0.15) |
| April Birthdate                  | -1.29***<br>(0.15) | -1.29***<br>(0.15) | -1.63***<br>(0.15) | -1.63***<br>(0.15) |
| May Birthdate                    | -1.28***<br>(0.14) | -1.28***<br>(0.14) | -1.86***<br>(0.15) | -1.86***<br>(0.15) |
| June Birthdate                   | -1.36***<br>(0.14) | -1.36***<br>(0.14) | -2.04***<br>(0.14) | -2.04***<br>(0.14) |
| July Birthdate                   | -1.47***<br>(0.14) | -1.48***<br>(0.14) | -2.21***<br>(0.14) | -2.21***<br>(0.14) |
| August Birthdate                 | -1.17***<br>(0.14) | -1.17***<br>(0.14) | -1.98***<br>(0.14) | -1.98***<br>(0.14) |
| September Birthdate              | -0.77***<br>(0.14) | -0.77***<br>(0.14) | -1.58***<br>(0.14) | -1.58***<br>(0.14) |
| October Birthdate                | 6.00***<br>(0.15)  | 6.00***<br>(0.15)  | 5.26***<br>(0.15)  | 5.25***<br>(0.15)  |

|                    |                     |                     |                     |                     |
|--------------------|---------------------|---------------------|---------------------|---------------------|
| November Birthdate | 12.95***<br>(0.16)  | 12.95***<br>(0.16)  | 12.28***<br>(0.16)  | 12.28***<br>(0.16)  |
| December Birthdate | 12.69***<br>(0.16)  | 12.68***<br>(0.16)  | 11.96***<br>(0.16)  | 11.95***<br>(0.16)  |
| Constant           | 150.97***<br>(0.57) | 150.86***<br>(0.57) | 142.76***<br>(0.58) | 142.63***<br>(0.58) |
| <hr/>              |                     |                     |                     |                     |
| N                  | 2,344,358           | 2,344,358           | 2,344,358           | 2,344,358           |
| R2                 | 0.345               | 0.345               | 0.322               | 0.322               |

Note: The omitted categories for the categorical explanatory variables correspond to BLL = 1, female, all other races/ethnicities, not economically disadvantaged, not on Medicaid, mother married at the time of birth, mother did not use alcohol during pregnancy, mother did not smoke during pregnancy, mother less than 21 years old at the time of birth, and parents had no high school education as of the time of child's birth. All estimates are from regression models that include school-grade-year dummy variables. Robust standard errors clustered at the student level are presented in parentheses. \*\*\* indicates the corresponding coefficient is significantly different from zero at the 0.1% level; \*\* indicates the corresponding coefficient is significantly different from zero at the 1% level; and \* indicates the corresponding coefficient is significantly different from zero at the 5% level.

Table S4. Changes in BLL Effects on Test Scores by Grade: Full Regression Results (corresponding to Table 3 in main text).

|                      | <u>Math Percentile</u>    |                          |                         | <u>Reading Percentile</u> |                          |                         |
|----------------------|---------------------------|--------------------------|-------------------------|---------------------------|--------------------------|-------------------------|
|                      | Full BLL $\leq$ 10<br>(1) | Full BLL $\leq$ 5<br>(2) | CEM BLL $\leq$ 5<br>(3) | Full BLL $\leq$ 10<br>(4) | Full BLL $\leq$ 5<br>(5) | CEM BLL $\leq$ 5<br>(6) |
| BLL 2                | -0.22<br>(0.12)           | -0.19<br>(0.12)          | -0.50*<br>(0.22)        | -0.29*<br>(0.12)          | -0.30*<br>(0.12)         | -0.65**<br>(0.23)       |
| BLL 2 $\times$ grade | -0.03<br>(0.03)           | -0.02<br>(0.04)          | 0.05<br>(0.07)          | -0.02<br>(0.04)           | -0.02<br>(0.04)          | 0.04<br>(0.07)          |
| BLL 3                | -0.36**<br>(0.12)         | -0.28*<br>(0.12)         | -0.46<br>(0.24)         | -0.61***<br>(0.12)        | -0.59***<br>(0.12)       | -0.85***<br>(0.24)      |
| BLL 3 $\times$ grade | -0.05<br>(0.03)           | -0.05<br>(0.03)          | -0.05<br>(0.07)         | -0.05<br>(0.03)           | -0.05<br>(0.04)          | -0.07<br>(0.07)         |
| BLL 4                | -0.67***<br>(0.13)        | -0.65***<br>(0.13)       | -0.78**<br>(0.29)       | -1.03***<br>(0.13)        | -1.06***<br>(0.13)       | -1.12***<br>(0.29)      |
| BLL 4 $\times$ grade | -0.03<br>(0.04)           | -0.02<br>(0.04)          | -0.07<br>(0.08)         | -0.01<br>(0.04)           | -0.01<br>(0.04)          | -0.08<br>(0.08)         |
| BLL 5                | -0.90***<br>(0.14)        | -0.82***<br>(0.16)       | -0.54<br>(0.40)         | -1.35***<br>(0.14)        | -1.31***<br>(0.16)       | -1.11**<br>(0.40)       |
| BLL 5 $\times$ grade | -0.06<br>(0.04)           | -0.06<br>(0.04)          | 0.01<br>(0.11)          | -0.04<br>(0.04)           | -0.05<br>(0.04)          | 0.05<br>(0.11)          |
| BLL 6                | -1.11***<br>(0.16)        |                          |                         | -1.67***<br>(0.16)        |                          |                         |
| BLL 6 $\times$ grade | -0.08<br>(0.04)           |                          |                         | -0.08<br>(0.04)           |                          |                         |
| BLL 7                | -0.93***<br>(0.19)        |                          |                         | -1.60***<br>(0.19)        |                          |                         |
| BLL 7 $\times$ grade | -0.08<br>(0.05)           |                          |                         | -0.08<br>(0.05)           |                          |                         |
| BLL 8                | -1.22***<br>(0.23)        |                          |                         | -2.11***<br>(0.24)        |                          |                         |

|                    |           |           |           |          |          |          |
|--------------------|-----------|-----------|-----------|----------|----------|----------|
| BLL 8 × grade      | -0.13*    |           |           | -0.01    |          |          |
|                    | (0.06)    |           |           | (0.06)   |          |          |
| BLL 9              | -1.27***  |           |           | -2.44*** |          |          |
|                    | (0.30)    |           |           | (0.29)   |          |          |
| BLL 9 × grade      | -0.13     |           |           | -0.05    |          |          |
|                    | (0.07)    |           |           | (0.07)   |          |          |
| BLL 10             | -2.23***  |           |           | -3.02*** |          |          |
|                    | (0.48)    |           |           | (0.47)   |          |          |
| BLL 10 × grade     | 0.02      |           |           | 0.04     |          |          |
|                    | (0.10)    |           |           | (0.10)   |          |          |
| Male               | 2.15***   | 2.21***   | 2.45***   | -2.86*** | -2.83*** | -2.53*** |
|                    | (0.06)    | (0.07)    | (0.18)    | (0.06)   | (0.07)   | (0.18)   |
| Male × grade       | -0.57***  | -0.56***  | -0.49***  | 0.10***  | 0.10***  | 0.08     |
|                    | (0.02)    | (0.02)    | (0.05)    | (0.02)   | (0.02)   | (0.05)   |
| White              | 3.96***   | 3.83***   | 3.78***   | 6.75***  | 6.79***  | 5.49***  |
|                    | (0.12)    | (0.14)    | (0.49)    | (0.12)   | (0.14)   | (0.49)   |
| White × grade      | -0.69***  | -0.69***  | -0.45**   | -0.64*** | -0.64*** | -0.54*** |
|                    | (0.04)    | (0.04)    | (0.17)    | (0.04)   | (0.04)   | (0.16)   |
| Black              | -10.50*** | -10.67*** | -10.47*** | -5.90*** | -5.94*** | -7.41*** |
|                    | (0.12)    | (0.14)    | (0.58)    | (0.12)   | (0.14)   | (0.58)   |
| Black × grade      | -0.05     | -0.06     | -0.45*    | -0.78*** | -0.79*** | -1.09*** |
|                    | (0.04)    | (0.04)    | (0.20)    | (0.04)   | (0.04)   | (0.20)   |
| EconDisadv         | -5.06***  | -5.08***  | -5.48***  | -5.99*** | -5.97*** | -6.14*** |
|                    | (0.09)    | (0.10)    | (0.46)    | (0.09)   | (0.10)   | (0.46)   |
| EconDisadv × grade | -0.06*    | -0.05     | -0.21     | 0.05     | 0.04     | -0.09    |
|                    | (0.03)    | (0.03)    | (0.14)    | (0.03)   | (0.03)   | (0.14)   |
| Medicaid           | -1.77***  | -1.77***  | -1.75***  | -1.54*** | -1.52*** | -1.94*** |
|                    | (0.08)    | (0.10)    | (0.46)    | (0.08)   | (0.10)   | (0.47)   |
| Medicaid × grade   | 0.07**    | 0.07**    | 0.09      | 0.07**   | 0.09***  | 0.08     |
|                    | (0.02)    | (0.03)    | (0.14)    | (0.02)   | (0.03)   | (0.14)   |

|                                  |                     |                     |                    |                     |                     |                    |
|----------------------------------|---------------------|---------------------|--------------------|---------------------|---------------------|--------------------|
| Not Married                      | -0.82***<br>(0.08)  | -0.94***<br>(0.10)  | -2.04***<br>(0.47) | -0.11<br>(0.08)     | -0.23*<br>(0.10)    | -1.09*<br>(0.46)   |
| Not Married × grade              | -0.11***<br>(0.02)  | -0.09***<br>(0.03)  | 0.37*<br>(0.15)    | -0.13***<br>(0.02)  | -0.09**<br>(0.03)   | 0.18<br>(0.15)     |
| Used Alcohol                     | 0.48<br>(0.30)      | 0.45<br>(0.37)      | 0.93<br>(1.07)     | 0.89**<br>(0.30)    | 0.76*<br>(0.37)     | 1.52<br>(1.05)     |
| Used Alcohol × grade             | 0.05<br>(0.07)      | -0.04<br>(0.09)     | -0.24<br>(0.29)    | -0.03<br>(0.07)     | -0.11<br>(0.09)     | -0.12<br>(0.28)    |
| Smoked                           | -1.37***<br>(0.09)  | -1.43***<br>(0.11)  | -2.10***<br>(0.32) | -1.15***<br>(0.09)  | -1.13***<br>(0.11)  | -2.30***<br>(0.33) |
| Smoked × grade                   | -0.32***<br>(0.02)  | -0.32***<br>(0.03)  | -0.37***<br>(0.09) | -0.09***<br>(0.02)  | -0.09**<br>(0.03)   | 0.03<br>(0.09)     |
| Age in 3rd Grade                 | -11.54***<br>(0.07) | -11.62***<br>(0.08) | -9.22***<br>(0.23) | -11.22***<br>(0.07) | -11.14***<br>(0.08) | -8.15***<br>(0.23) |
| Age in 3rd Grade × grade         | -0.41***<br>(0.02)  | -0.41***<br>(0.02)  | -0.45***<br>(0.05) | -0.21***<br>(0.02)  | -0.22***<br>(0.02)  | -0.37***<br>(0.05) |
| Mother 21-29 years               | -1.23***<br>(0.09)  | -1.24***<br>(0.10)  | -1.73***<br>(0.48) | -1.83***<br>(0.09)  | -1.83***<br>(0.10)  | -2.46***<br>(0.48) |
| Mother 21-29 years × grade       | 0.03<br>(0.02)      | 0.03<br>(0.03)      | -0.05<br>(0.15)    | 0.12***<br>(0.02)   | 0.12***<br>(0.03)   | 0.10<br>(0.15)     |
| Mother 30+ years                 | -0.40***<br>(0.11)  | -0.32*<br>(0.12)    | -0.48<br>(0.54)    | -0.22*<br>(0.11)    | -0.17<br>(0.13)     | -0.89<br>(0.53)    |
| Mother 30+ years × grade         | 0.18***<br>(0.03)   | 0.20***<br>(0.03)   | 0.13<br>(0.17)     | 0.25***<br>(0.03)   | 0.26***<br>(0.03)   | 0.24<br>(0.17)     |
| Parents some high school         | 0.54**<br>(0.18)    | 0.70***<br>(0.21)   | 1.55*<br>(0.67)    | 2.24***<br>(0.17)   | 2.32***<br>(0.20)   | 3.24***<br>(0.66)  |
| Parents some high school × grade | -0.29***<br>(0.05)  | -0.36***<br>(0.06)  | -0.65*<br>(0.27)   | -0.26***<br>(0.05)  | -0.23***<br>(0.06)  | -0.54*<br>(0.26)   |
| Parents high school grad         | 3.30***<br>(0.17)   | 3.49***<br>(0.20)   | 4.64***<br>(0.70)  | 5.51***<br>(0.17)   | 5.74***<br>(0.20)   | 7.80***<br>(0.70)  |

|                                  |                    |                    |                    |                    |                    |                    |
|----------------------------------|--------------------|--------------------|--------------------|--------------------|--------------------|--------------------|
| Parents high school grad × grade | -0.27***<br>(0.05) | -0.29***<br>(0.06) | -0.62*<br>(0.27)   | -0.26***<br>(0.05) | -0.21***<br>(0.06) | -0.75**<br>(0.27)  |
| Parents some college             | 7.72***<br>(0.19)  | 7.87***<br>(0.21)  | 8.86***<br>(0.77)  | 10.03***<br>(0.18) | 10.15***<br>(0.21) | 12.42***<br>(0.77) |
| Parents some college × grade     | -0.18**<br>(0.05)  | -0.20**<br>(0.07)  | -0.33<br>(0.29)    | -0.12*<br>(0.05)   | -0.06<br>(0.07)    | -0.55<br>(0.28)    |
| Parents college grad             | 16.90***<br>(0.20) | 17.08***<br>(0.23) | 18.73***<br>(0.78) | 18.87***<br>(0.20) | 19.07***<br>(0.23) | 21.97***<br>(0.78) |
| Parents college grad × grade     | 0.07<br>(0.06)     | 0.06<br>(0.07)     | -0.13<br>(0.29)    | -0.02<br>(0.06)    | 0.05<br>(0.07)     | -0.44<br>(0.29)    |
| February Birthdate               | -0.68***<br>(0.15) | -0.76***<br>(0.17) | -0.53<br>(0.36)    | -0.79***<br>(0.15) | -0.93***<br>(0.17) | -0.44<br>(0.36)    |
| March Birthdate                  | -0.71***<br>(0.15) | -0.85***<br>(0.17) | -0.79*<br>(0.34)   | -1.12***<br>(0.15) | -1.20***<br>(0.17) | -1.21***<br>(0.34) |
| April Birthdate                  | -1.29***<br>(0.15) | -1.39***<br>(0.17) | -2.18***<br>(0.35) | -1.63***<br>(0.15) | -1.67***<br>(0.17) | -2.17***<br>(0.35) |
| May Birthdate                    | -1.28***<br>(0.14) | -1.33***<br>(0.17) | -1.17***<br>(0.34) | -1.86***<br>(0.15) | -1.82***<br>(0.17) | -1.56***<br>(0.34) |
| June Birthdate                   | -1.36***<br>(0.14) | -1.48***<br>(0.17) | -1.59***<br>(0.35) | -2.04***<br>(0.14) | -2.13***<br>(0.17) | -2.17***<br>(0.35) |
| July Birthdate                   | -1.47***<br>(0.14) | -1.63***<br>(0.16) | -1.50***<br>(0.34) | -2.21***<br>(0.14) | -2.40***<br>(0.16) | -2.35***<br>(0.34) |
| August Birthdate                 | -1.16***<br>(0.14) | -1.32***<br>(0.16) | -0.82*<br>(0.34)   | -1.98***<br>(0.14) | -2.18***<br>(0.16) | -1.80***<br>(0.34) |
| September Birthdate              | -0.77***<br>(0.14) | -0.80***<br>(0.16) | 0.19<br>(0.35)     | -1.58***<br>(0.14) | -1.68***<br>(0.16) | -0.78*<br>(0.35)   |
| October Birthdate                | 6.00***<br>(0.15)  | 6.10***<br>(0.18)  | 5.92***<br>(0.37)  | 5.25***<br>(0.15)  | 5.20***<br>(0.18)  | 4.90***<br>(0.37)  |
| November Birthdate               | 12.95***<br>(0.16) | 13.07***<br>(0.19) | 11.16***<br>(0.41) | 12.27***<br>(0.16) | 12.33***<br>(0.19) | 10.00***<br>(0.41) |

|                    |                     |                     |                     |                     |                     |                     |
|--------------------|---------------------|---------------------|---------------------|---------------------|---------------------|---------------------|
| December Birthdate | 12.68***<br>(0.16)  | 12.70***<br>(0.18)  | 10.86***<br>(0.40)  | 11.95***<br>(0.16)  | 11.83***<br>(0.19)  | 9.50***<br>(0.41)   |
| Constant           | 150.87***<br>(0.57) | 151.39***<br>(0.68) | 135.03***<br>(1.80) | 142.57***<br>(0.58) | 141.75***<br>(0.70) | 122.94***<br>(1.82) |
| N                  | 2,344,358           | 1,789,255           | 387,794             | 2,344,358           | 1,789,255           | 387,794             |
| R2                 | 0.345               | 0.346               | 0.418               | 0.322               | 0.322               | 0.395               |

---

The omitted categories for the categorical explanatory variables correspond to BLL = 1, female, all other races/ethnicities, not economically disadvantaged, not on Medicaid, mother married at the time of birth, mother did not use alcohol during pregnancy, mother did not smoke during pregnancy, mother less than 21 years old at the time of birth, and parents had no high school education as of the time of child's birth. All estimates are from regression models that include school-grade-year dummy variables. Robust standard errors clustered at the student level are presented in parentheses. \*\*\* indicates the corresponding coefficient is significantly different from zero at the 0.1% level; \*\* indicates the corresponding coefficient is significantly different from zero at the 1% level; and \* indicates the corresponding coefficient is significantly different from zero at the 5% level.

Table S5. Effect of BLL on Math and Reading Test Score Percentiles at 3<sup>rd</sup> and 8<sup>th</sup> Grade across Race and Socioeconomic Groups (corresponding to Figure 4 in main text).

|               | <u>Math Percentile</u> | <u>Reading Percentile</u> |
|---------------|------------------------|---------------------------|
|               | Full BLL ≤ 10          | Full BLL ≤ 10             |
|               | (1)                    | (2)                       |
| BLL 2         | -0.40*                 | -0.50**                   |
|               | (0.17)                 | (0.17)                    |
| BLL 2 × grade | -0.11*                 | -0.07                     |
|               | (0.05)                 | (0.05)                    |
| BLL 3         | -0.71***               | -0.97***                  |
|               | (0.18)                 | (0.18)                    |
| BLL 3 × grade | -0.14**                | -0.05                     |
|               | (0.05)                 | (0.05)                    |
| BLL 4         | -1.40***               | -1.62***                  |
|               | (0.20)                 | (0.20)                    |
| BLL 4 × grade | -0.04                  | 0.03                      |
|               | (0.05)                 | (0.05)                    |
| BLL 5         | -1.56***               | -1.94***                  |
|               | (0.23)                 | (0.23)                    |
| BLL 5 × grade | -0.12*                 | 0.02                      |
|               | (0.06)                 | (0.06)                    |
| BLL 6         | -2.10***               | -2.41***                  |
|               | (0.28)                 | (0.29)                    |
| BLL 6 × grade | -0.10                  | -0.02                     |
|               | (0.07)                 | (0.07)                    |
| BLL 7         | -1.38***               | -1.50***                  |
|               | (0.35)                 | (0.36)                    |
| BLL 7 × grade | -0.17*                 | -0.11                     |
|               | (0.08)                 | (0.09)                    |
| BLL 8         | -1.71***               | -2.30***                  |
|               | (0.44)                 | (0.46)                    |

|                       |          |          |
|-----------------------|----------|----------|
| BLL 8 × grade         | -0.24*   | -0.07    |
|                       | (0.10)   | (0.11)   |
| BLL 9                 | -2.18*** | -2.72*** |
|                       | (0.57)   | (0.58)   |
| BLL 9 × grade         | -0.35**  | -0.20    |
|                       | (0.13)   | (0.13)   |
| BLL 10                | -3.07*** | -3.31*** |
|                       | (0.91)   | (0.94)   |
| BLL 10 × grade        | 0.15     | 0.12     |
|                       | (0.20)   | (0.20)   |
| BLL 2 × Black         | -0.29    | -0.22    |
|                       | (0.29)   | (0.28)   |
| BLL 2 × Black × grade | 0.10     | 0.06     |
|                       | (0.09)   | (0.09)   |
| BLL 3 × Black         | -0.43    | -0.27    |
|                       | (0.28)   | (0.28)   |
| BLL 3 × Black × grade | 0.27**   | 0.13     |
|                       | (0.09)   | (0.09)   |
| BLL 4 × Black         | -0.36    | -0.37    |
|                       | (0.29)   | (0.29)   |
| BLL 4 × Black × grade | 0.18*    | 0.11     |
|                       | (0.09)   | (0.09)   |
| BLL 5 × Black         | 0.18     | -0.13    |
|                       | (0.32)   | (0.32)   |
| BLL 5 × Black × grade | 0.10     | 0.02     |
|                       | (0.09)   | (0.09)   |
| BLL 6 × Black         | -0.02    | -0.50    |
|                       | (0.36)   | (0.36)   |
| BLL 6 × Black × grade | 0.17     | 0.06     |
|                       | (0.10)   | (0.10)   |

|                          |                 |                 |
|--------------------------|-----------------|-----------------|
| BLL 7 × Black            | -0.35<br>(0.42) | -0.54<br>(0.42) |
| BLL 7 × Black × grade    | 0.26*<br>(0.11) | 0.15<br>(0.11)  |
| BLL 8 × Black            | 0.49<br>(0.51)  | 0.04<br>(0.52)  |
| BLL 8 × Black × grade    | 0.15<br>(0.13)  | 0.06<br>(0.13)  |
| BLL 9 × Black            | -0.95<br>(0.65) | -0.74<br>(0.63) |
| BLL 9 × Black × grade    | 0.40*<br>(0.16) | 0.17<br>(0.16)  |
| BLL 10 × Black           | 0.51<br>(1.05)  | -0.78<br>(1.02) |
| BLL 10 × Black × grade   | 0.28<br>(0.23)  | 0.24<br>(0.23)  |
| BLL 2 × Medicaid         | 0.24<br>(0.27)  | -0.03<br>(0.27) |
| BLL 2 × Medicaid × grade | 0.06<br>(0.09)  | 0.03<br>(0.09)  |
| BLL 3 × Medicaid         | 0.11<br>(0.27)  | -0.01<br>(0.27) |
| BLL 3 × Medicaid × grade | 0.14<br>(0.08)  | 0.13<br>(0.09)  |
| BLL 4 × Medicaid         | 0.38<br>(0.28)  | 0.40<br>(0.28)  |
| BLL 4 × Medicaid × grade | 0.12<br>(0.09)  | -0.03<br>(0.09) |
| BLL 5 × Medicaid         | 0.48<br>(0.31)  | 0.50<br>(0.31)  |

|                            |                  |                  |
|----------------------------|------------------|------------------|
| BLL 5 × Medicaid × grade   | 0.11<br>(0.09)   | -0.00<br>(0.09)  |
| BLL 6 × Medicaid           | 0.60<br>(0.34)   | 0.78*<br>(0.34)  |
| BLL 6 × Medicaid × grade   | 0.09<br>(0.10)   | -0.10<br>(0.10)  |
| BLL 7 × Medicaid           | 0.85*<br>(0.41)  | 0.63<br>(0.40)   |
| BLL 7 × Medicaid × grade   | 0.02<br>(0.11)   | -0.12<br>(0.11)  |
| BLL 8 × Medicaid           | 0.46<br>(0.49)   | 0.63<br>(0.50)   |
| BLL 8 × Medicaid × grade   | 0.13<br>(0.13)   | -0.09<br>(0.13)  |
| BLL 9 × Medicaid           | 1.00<br>(0.65)   | 0.55<br>(0.64)   |
| BLL 9 × Medicaid × grade   | 0.06<br>(0.16)   | -0.02<br>(0.16)  |
| BLL 10 × Medicaid          | 1.83<br>(1.23)   | 0.74<br>(1.25)   |
| BLL 10 × Medicaid × grade  | 0.42<br>(0.27)   | 0.38<br>(0.28)   |
| BLL 2 × EconDisadv         | 0.32<br>(0.27)   | 0.58*<br>(0.27)  |
| BLL 2 × EconDisadv × grade | 0.15<br>(0.09)   | 0.08<br>(0.09)   |
| BLL 3 × EconDisadv         | 0.81**<br>(0.27) | 0.84**<br>(0.27) |
| BLL 3 × EconDisadv × grade | 0.01<br>(0.09)   | -0.13<br>(0.09)  |

|                             |                   |                    |
|-----------------------------|-------------------|--------------------|
| BLL 4 × EconDisadv          | 1.13***<br>(0.28) | 0.91**<br>(0.29)   |
| BLL 4 × EconDisadv × grade  | -0.02<br>(0.09)   | -0.05<br>(0.09)    |
| BLL 5 × EconDisadv          | 0.59<br>(0.32)    | 0.67*<br>(0.32)    |
| BLL 5 × EconDisadv × grade  | 0.12<br>(0.10)    | -0.03<br>(0.10)    |
| BLL 6 × EconDisadv          | 1.11**<br>(0.37)  | 0.95*<br>(0.37)    |
| BLL 6 × EconDisadv × grade  | 0.03<br>(0.11)    | 0.02<br>(0.11)     |
| BLL 7 × EconDisadv          | 0.44<br>(0.44)    | -0.08<br>(0.44)    |
| BLL 7 × EconDisadv × grade  | 0.09<br>(0.13)    | 0.06<br>(0.13)     |
| BLL 8 × EconDisadv          | 0.12<br>(0.54)    | -0.08<br>(0.55)    |
| BLL 8 × EconDisadv × grade  | 0.13<br>(0.15)    | 0.15<br>(0.15)     |
| BLL 9 × EconDisadv          | 1.54*<br>(0.69)   | 0.69<br>(0.69)     |
| BLL 9 × EconDisadv × grade  | 0.16<br>(0.19)    | 0.18<br>(0.19)     |
| BLL 10 × EconDisadv         | 0.31<br>(1.12)    | 0.75<br>(1.11)     |
| BLL 10 × EconDisadv × grade | -0.38<br>(0.27)   | -0.33<br>(0.28)    |
| Male                        | 2.15***<br>(0.06) | -2.86***<br>(0.06) |

|                      |                     |                    |
|----------------------|---------------------|--------------------|
| Male × grade         | -0.57***<br>(0.02)  | 0.10***<br>(0.02)  |
| White                | 3.93***<br>(0.12)   | 6.72***<br>(0.12)  |
| White × grade        | -0.69***<br>(0.04)  | -0.63***<br>(0.04) |
| Black                | -10.30***<br>(0.26) | -5.67***<br>(0.26) |
| Black × grade        | -0.22**<br>(0.08)   | -0.86***<br>(0.08) |
| EconDisadv           | -5.67***<br>(0.22)  | -6.59***<br>(0.22) |
| EconDisadv × grade   | -0.13<br>(0.07)     | 0.06<br>(0.08)     |
| Medicaid             | -2.06***<br>(0.22)  | -1.75***<br>(0.22) |
| Medicaid × grade     | -0.04<br>(0.07)     | 0.05<br>(0.07)     |
| Not Married          | -0.81***<br>(0.08)  | -0.11<br>(0.08)    |
| Not Married × grade  | -0.12***<br>(0.02)  | -0.13***<br>(0.02) |
| Used Alcohol         | 0.47<br>(0.30)      | 0.89**<br>(0.30)   |
| Used Alcohol × grade | 0.05<br>(0.07)      | -0.03<br>(0.07)    |
| Smoked               | -1.36***<br>(0.09)  | -1.15***<br>(0.09) |
| Smoked × grade       | -0.31***<br>(0.02)  | -0.09***<br>(0.02) |

|                                  |                     |                     |
|----------------------------------|---------------------|---------------------|
| Age in 3rd Grade                 | -11.56***<br>(0.07) | -11.22***<br>(0.07) |
| Age in 3rd Grade × grade         | -0.41***<br>(0.02)  | -0.21***<br>(0.02)  |
| Mother 21-29 years               | -1.22***<br>(0.09)  | -1.83***<br>(0.09)  |
| Mother 21-29 years × grade       | 0.03<br>(0.02)      | 0.12***<br>(0.02)   |
| Mother 30+ years                 | -0.40***<br>(0.11)  | -0.22*<br>(0.11)    |
| Mother 30+ years × grade         | 0.18***<br>(0.03)   | 0.25***<br>(0.03)   |
| Parents some high school         | 0.54**<br>(0.18)    | 2.23***<br>(0.17)   |
| Parents some high school × grade | -0.29***<br>(0.05)  | -0.26***<br>(0.05)  |
| Parents high school grad         | 3.30***<br>(0.17)   | 5.51***<br>(0.17)   |
| Parents high school grad × grade | -0.27***<br>(0.05)  | -0.26***<br>(0.05)  |
| Parents some college             | 7.73***<br>(0.19)   | 10.03***<br>(0.18)  |
| Parents some college × grade     | -0.18**<br>(0.05)   | -0.12*<br>(0.05)    |
| Parents college grad             | 16.87***<br>(0.20)  | 18.84***<br>(0.20)  |
| Parents college grad × grade     | 0.07<br>(0.06)      | -0.01<br>(0.06)     |
| February Birthdate               | -0.67***<br>(0.15)  | -0.79***<br>(0.15)  |

|                     |                     |                     |
|---------------------|---------------------|---------------------|
| March Birthdate     | -0.71***<br>(0.15)  | -1.12***<br>(0.15)  |
| April Birthdate     | -1.29***<br>(0.15)  | -1.63***<br>(0.15)  |
| May Birthdate       | -1.28***<br>(0.14)  | -1.86***<br>(0.15)  |
| June Birthdate      | -1.36***<br>(0.14)  | -2.04***<br>(0.14)  |
| July Birthdate      | -1.47***<br>(0.14)  | -2.21***<br>(0.14)  |
| August Birthdate    | -1.16***<br>(0.14)  | -1.98***<br>(0.14)  |
| September Birthdate | -0.77***<br>(0.14)  | -1.58***<br>(0.14)  |
| October Birthdate   | 6.01***<br>(0.15)   | 5.26***<br>(0.15)   |
| November Birthdate  | 12.96***<br>(0.16)  | 12.27***<br>(0.16)  |
| December Birthdate  | 12.69***<br>(0.16)  | 11.95***<br>(0.16)  |
| Constant            | 151.53***<br>(0.58) | 142.95***<br>(0.59) |
| N                   | 2,344,358           | 2,344,358           |
| R2                  | 0.345               | 0.322               |

The omitted categories for the categorical explanatory variables correspond to BLL = 1, female, all other races/ethnicities, not economically disadvantaged, not on Medicaid, mother married at the time of birth, mother did not use alcohol during pregnancy, mother did not smoke during pregnancy, mother less than 21 years old at the time of birth, and parents had no high school education as of the time of child's birth. All estimates are from regression models that include school-grade-year dummy variables. Robust standard errors clustered at the student level are presented in parentheses. \*\*\* indicates the corresponding coefficient is significantly different from zero at the 0.1% level; \*\* indicates the corresponding coefficient is significantly different from zero at the 1% level; and \* indicates the corresponding coefficient is significantly different from zero at the 5% level.

Table S6. Effects of BLL on Test Scores: Base Regression Results with different forms for the dependent variable – Percentiles, Z-score, original raw test score. (Corresponds to columns 1 and 4 in Table 2 of manuscript.)

|        | <u>Math</u>         |                    |                    | <u>Reading</u>     |                    |                    |
|--------|---------------------|--------------------|--------------------|--------------------|--------------------|--------------------|
|        | Full BLL $\leq$ 10  |                    |                    | Full BLL $\leq$ 10 |                    |                    |
|        | Percentile<br>(1)   | Z-score<br>(2)     | Raw score<br>(3)   | Percentile<br>(4)  | Z-score<br>(5)     | Raw score<br>(6)   |
| BLL 2  | -0.25*<br>(0.11)    | -0.01*<br>(0.00)   | -0.08*<br>(0.03)   | -0.32**<br>(0.11)  | -0.01**<br>(0.00)  | -0.11***<br>(0.03) |
| BLL 3  | -0.44***<br>(0.11)  | -0.01***<br>(0.00) | -0.13***<br>(0.03) | -0.69***<br>(0.11) | -0.02***<br>(0.00) | -0.22***<br>(0.03) |
| BLL 4  | -0.69***<br>(0.12)  | -0.02***<br>(0.00) | -0.21***<br>(0.03) | -1.03***<br>(0.12) | -0.03***<br>(0.00) | -0.31***<br>(0.03) |
| BLL 5  | -1.00***<br>(0.13)  | -0.03***<br>(0.00) | -0.28***<br>(0.04) | -1.42***<br>(0.13) | -0.05***<br>(0.00) | -0.42***<br>(0.04) |
| BLL 6  | -1.26***<br>(0.15)  | -0.04***<br>(0.01) | -0.35***<br>(0.04) | -1.84***<br>(0.15) | -0.07***<br>(0.01) | -0.52***<br>(0.04) |
| BLL 7  | -1.10***<br>(0.17)  | -0.04***<br>(0.01) | -0.32***<br>(0.05) | -1.78***<br>(0.17) | -0.06***<br>(0.01) | -0.50***<br>(0.05) |
| BLL 8  | -1.51***<br>(0.21)  | -0.05***<br>(0.01) | -0.45***<br>(0.06) | -2.13***<br>(0.21) | -0.08***<br>(0.01) | -0.60***<br>(0.06) |
| BLL 9  | -1.56***<br>(0.26)  | -0.06***<br>(0.01) | -0.46***<br>(0.08) | -2.55***<br>(0.26) | -0.09***<br>(0.01) | -0.71***<br>(0.08) |
| BLL 10 | -2.17***<br>(0.42)  | -0.08***<br>(0.01) | -0.62***<br>(0.12) | -2.92***<br>(0.41) | -0.11***<br>(0.01) | -0.79***<br>(0.11) |
| Male   | 0.93***<br>(0.06)   | 0.03***<br>(0.00)  | 0.23***<br>(0.02)  | -2.66***<br>(0.06) | -0.11***<br>(0.00) | -0.88***<br>(0.02) |
| White  | 2.54***<br>(0.11)   | 0.08***<br>(0.00)  | 0.67***<br>(0.03)  | 5.49***<br>(0.11)  | 0.17***<br>(0.00)  | 1.49***<br>(0.03)  |
| Black  | -10.52***<br>(0.11) | -0.36***<br>(0.00) | -3.09***<br>(0.03) | -7.50***<br>(0.11) | -0.25***<br>(0.00) | -2.03***<br>(0.03) |

|                          |                     |                    |                     |                     |                    |                     |
|--------------------------|---------------------|--------------------|---------------------|---------------------|--------------------|---------------------|
| EconDisadv               | -5.20***<br>(0.07)  | -0.17***<br>(0.00) | -1.46***<br>(0.02)  | -5.90***<br>(0.07)  | -0.19***<br>(0.00) | -1.61***<br>(0.02)  |
| Medicaid                 | -1.60***<br>(0.08)  | -0.06***<br>(0.00) | -0.51***<br>(0.02)  | -1.36***<br>(0.08)  | -0.05***<br>(0.00) | -0.50***<br>(0.02)  |
| Not Married              | -1.05***<br>(0.08)  | -0.03***<br>(0.00) | -0.29***<br>(0.02)  | -0.40***<br>(0.08)  | -0.01***<br>(0.00) | -0.09***<br>(0.02)  |
| Used Alcohol             | 0.58*<br>(0.27)     | 0.01<br>(0.01)     | 0.14<br>(0.08)      | 0.80**<br>(0.27)    | 0.02*<br>(0.01)    | 0.23**<br>(0.08)    |
| Smoked                   | -2.05***<br>(0.08)  | -0.07***<br>(0.00) | -0.57***<br>(0.02)  | -1.32***<br>(0.08)  | -0.04***<br>(0.00) | -0.35***<br>(0.02)  |
| Age in 3rd Grade         | -12.43***<br>(0.06) | -0.45***<br>(0.00) | -3.79***<br>(0.02)  | -11.67***<br>(0.07) | -0.44***<br>(0.00) | -3.65***<br>(0.02)  |
| Mother 21-29 years       | -1.18***<br>(0.08)  | -0.04***<br>(0.00) | -0.38***<br>(0.02)  | -1.57***<br>(0.08)  | -0.06***<br>(0.00) | -0.52***<br>(0.02)  |
| Mother 30+ years         | -0.02<br>(0.10)     | -0.01<br>(0.00)    | -0.05<br>(0.03)     | 0.32**<br>(0.10)    | 0.00<br>(0.00)     | -0.01<br>(0.03)     |
| Parents some high school | -0.05<br>(0.16)     | -0.00<br>(0.01)    | 0.01<br>(0.05)      | 1.72***<br>(0.16)   | 0.06***<br>(0.01)  | 0.57***<br>(0.05)   |
| Parents high school grad | 2.77***<br>(0.16)   | 0.10***<br>(0.01)  | 0.86***<br>(0.05)   | 5.00***<br>(0.16)   | 0.18***<br>(0.01)  | 1.57***<br>(0.05)   |
| Parents some college     | 7.40***<br>(0.17)   | 0.25***<br>(0.01)  | 2.17***<br>(0.05)   | 9.85***<br>(0.17)   | 0.34***<br>(0.01)  | 2.90***<br>(0.05)   |
| Parents college grad     | 17.11***<br>(0.19)  | 0.58***<br>(0.01)  | 4.99***<br>(0.06)   | 18.92***<br>(0.19)  | 0.64***<br>(0.01)  | 5.38***<br>(0.06)   |
| Constant                 | 150.73***<br>(0.57) | 3.65***<br>(0.02)  | 386.49***<br>(0.17) | 142.35***<br>(0.58) | 3.53***<br>(0.02)  | 382.07***<br>(0.18) |
| <hr/>                    |                     |                    |                     |                     |                    |                     |
| N                        | 2,344,358           | 2,344,358          | 2,344,358           | 2,344,358           | 2,344,358          | 2,344,358           |
| R2                       | 0.344               | 0.342              | 0.579               | 0.322               | 0.318              | 0.601               |

*Note:* The omitted categories for the categorical explanatory variables correspond to BLL = 1, female, all other races/ethnicities, not economically disadvantaged, not on Medicaid, mother married at the time of birth, mother did not use alcohol during pregnancy, mother did not smoke during pregnancy, mother less than 21 years old at the time of birth, and parents had no high school education as of the time of child's birth. All estimates are from regression models that include school-grade-year dummy variables and dummy variables denoting the month of birth. Robust standard errors clustered at the student level are presented in parentheses. \*\*\* indicates the corresponding coefficient is significantly different from zero at the 0.1% level; \*\* indicates the corresponding coefficient is significantly different from zero at the 1% level; and \* indicates the corresponding coefficient is significantly different from zero at the 5% level.

Table S7. Changes in BLL Effects on Test Scores by Grade with different forms for the dependent variable – Percentiles, Z-score, original raw test score. (Corresponds to columns 1 and 4 in Table 3 of manuscript.)

|                      | Math               |                    |                    | Reading            |                    |                    |
|----------------------|--------------------|--------------------|--------------------|--------------------|--------------------|--------------------|
|                      | Full BLL $\leq$ 10 |                    |                    | Full BLL $\leq$ 10 |                    |                    |
|                      | Percentile<br>(1)  | Z-score<br>(2)     | Raw score<br>(3)   | Percentile<br>(4)  | Z-score<br>(5)     | Raw score<br>(6)   |
| BLL 2                | -0.22<br>(0.12)    | -0.01<br>(0.00)    | -0.07<br>(0.03)    | -0.29*<br>(0.12)   | -0.01*<br>(0.00)   | -0.12**<br>(0.04)  |
| BLL 2 $\times$ grade | -0.03<br>(0.03)    | -0.00<br>(0.00)    | -0.01<br>(0.01)    | -0.02<br>(0.04)    | -0.00<br>(0.00)    | 0.00<br>(0.01)     |
| BLL 3                | -0.36***<br>(0.12) | -0.01**<br>(0.00)  | -0.12***<br>(0.03) | -0.61***<br>(0.12) | -0.02***<br>(0.00) | -0.23***<br>(0.04) |
| BLL 3 $\times$ grade | -0.05<br>(0.03)    | -0.00<br>(0.00)    | -0.01<br>(0.01)    | -0.05<br>(0.03)    | -0.00<br>(0.00)    | 0.01<br>(0.01)     |
| BLL 4                | -0.67***<br>(0.13) | -0.02***<br>(0.00) | -0.21***<br>(0.04) | -1.03***<br>(0.13) | -0.04***<br>(0.00) | -0.36***<br>(0.04) |
| BLL 4 $\times$ grade | -0.03<br>(0.04)    | -0.00<br>(0.00)    | -0.01<br>(0.01)    | -0.01<br>(0.04)    | -0.00<br>(0.00)    | 0.02<br>(0.01)     |
| BLL 5                | -0.90***<br>(0.14) | -0.03***<br>(0.00) | -0.26***<br>(0.04) | -1.35***<br>(0.14) | -0.05***<br>(0.00) | -0.47***<br>(0.05) |
| BLL 5 $\times$ grade | -0.06<br>(0.04)    | -0.00<br>(0.00)    | -0.01<br>(0.01)    | -0.04<br>(0.04)    | -0.00<br>(0.00)    | 0.02<br>(0.01)     |
| BLL 6                | -1.11***<br>(0.16) | -0.04***<br>(0.01) | -0.30***<br>(0.05) | -1.67***<br>(0.16) | -0.06***<br>(0.01) | -0.56***<br>(0.05) |
| BLL 6 $\times$ grade | -0.08<br>(0.04)    | -0.00*<br>(0.00)   | -0.03*<br>(0.01)   | -0.08<br>(0.04)    | -0.00<br>(0.00)    | 0.01<br>(0.01)     |
| BLL 7                | -0.93***<br>(0.19) | -0.03***<br>(0.01) | -0.27***<br>(0.06) | -1.60***<br>(0.19) | -0.06***<br>(0.01) | -0.54***<br>(0.06) |
| BLL 7 $\times$ grade | -0.08<br>(0.05)    | -0.00<br>(0.00)    | -0.03<br>(0.01)    | -0.08<br>(0.05)    | -0.00<br>(0.00)    | 0.02<br>(0.01)     |

|                |                    |                    |                    |                    |                    |                    |
|----------------|--------------------|--------------------|--------------------|--------------------|--------------------|--------------------|
| BLL 8          | -1.22***<br>(0.23) | -0.05***<br>(0.01) | -0.35***<br>(0.07) | -2.11***<br>(0.24) | -0.08***<br>(0.01) | -0.71***<br>(0.08) |
| BLL 8 × grade  | -0.13*<br>(0.06)   | -0.00*<br>(0.00)   | -0.04*<br>(0.02)   | -0.01<br>(0.06)    | 0.00<br>(0.00)     | 0.04*<br>(0.02)    |
| BLL 9          | -1.27***<br>(0.30) | -0.05***<br>(0.01) | -0.35***<br>(0.09) | -2.44***<br>(0.29) | -0.09***<br>(0.01) | -0.81***<br>(0.10) |
| BLL 9 × grade  | -0.13<br>(0.07)    | -0.00<br>(0.00)    | -0.05*<br>(0.02)   | -0.05<br>(0.07)    | -0.00<br>(0.00)    | 0.04<br>(0.02)     |
| BLL 10         | -2.23***<br>(0.48) | -0.08***<br>(0.02) | -0.59***<br>(0.14) | -3.02***<br>(0.47) | -0.12***<br>(0.02) | -0.97***<br>(0.15) |
| BLL 10 × grade | 0.02<br>(0.10)     | 0.00<br>(0.00)     | -0.01<br>(0.03)    | 0.04<br>(0.10)     | 0.00<br>(0.00)     | 0.07*<br>(0.03)    |
| N              | 2,344,358          | 2,344,358          | 2,344,358          | 2,344,358          | 2,344,358          | 2,344,358          |
| R2             | 0.345              | 0.343              | 0.579              | 0.322              | 0.318              | 0.602              |

Note: The omitted categories for the categorical explanatory variables correspond to BLL = 1, female, all other races/ethnicities, not economically disadvantaged, not on Medicaid, mother married at the time of birth, mother did not use alcohol during pregnancy, mother did not smoke during pregnancy, mother less than 21 years old at the time of birth, and parents had no high school education as of the time of child's birth. All estimates are from regression models that include school-grade-year dummy variables, and dummy variables denoting the month of birth. All covariates listed in Table 2 are also included, both as a main effect and as an interaction term with grade. Only estimates corresponding to BLL are presented here. Robust standard errors clustered at the student level are presented in parentheses. \*\*\* indicates the corresponding coefficient is significantly different from zero at the 0.1% level; \*\* indicates the corresponding coefficient is significantly different from zero at the 1% level; and \* indicates the corresponding coefficient is significantly different from zero at the 5% level.

Table S8. Linear Probability Regression Model of BLL Effects on Probability of Test Scores below the Proficient Level.

|               | Math<br>Full BLL ≤ 10<br>(1) | Reading<br>Full BLL ≤ 10<br>(2) | Math<br>Full BLL ≤ 10<br>(3) | Reading<br>Full BLL ≤ 10<br>(4) |
|---------------|------------------------------|---------------------------------|------------------------------|---------------------------------|
| BLL 2         | 0.0007<br>(0.0013)           | 0.0018<br>(0.0015)              | 0.0012<br>(0.0016)           | 0.0033<br>(0.0018)              |
| BLL 2 × grade |                              |                                 | -0.0001<br>(0.0006)          | -0.0006<br>(0.0007)             |
| BLL 3         | 0.0012<br>(0.0014)           | 0.0060***<br>(0.0015)           | 0.0017<br>(0.0016)           | 0.0068***<br>(0.0019)           |
| BLL 3 × grade |                              |                                 | -0.0000<br>(0.0007)          | -0.0002<br>(0.0007)             |
| BLL 4         | 0.0050***<br>(0.0015)        | 0.0117***<br>(0.0016)           | 0.0059***<br>(0.0018)        | 0.0125***<br>(0.0020)           |
| BLL 4 × grade |                              |                                 | -0.0002<br>(0.0007)          | -0.0002<br>(0.0008)             |
| BLL 5         | 0.0067***<br>(0.0017)        | 0.0140***<br>(0.0018)           | 0.0064**<br>(0.0020)         | 0.0138***<br>(0.0023)           |
| BLL 5 × grade |                              |                                 | 0.0003<br>(0.0008)           | 0.0001<br>(0.0009)              |
| BLL 6         | 0.0099***<br>(0.0019)        | 0.0193***<br>(0.0021)           | 0.0066**<br>(0.0025)         | 0.0171***<br>(0.0027)           |
| BLL 6 × grade |                              |                                 | 0.0015<br>(0.0009)           | 0.0010<br>(0.0010)              |
| BLL 7         | 0.0073**<br>(0.0023)         | 0.0187***<br>(0.0025)           | 0.0043<br>(0.0028)           | 0.0180***<br>(0.0033)           |
| BLL 7 × grade |                              |                                 | 0.0013<br>(0.0010)           | 0.0003<br>(0.0011)              |

|                    |                        |                        |                        |                        |
|--------------------|------------------------|------------------------|------------------------|------------------------|
| BLL 8              | 0.0145***<br>(0.0028)  | 0.0228***<br>(0.0030)  | 0.0056<br>(0.0037)     | 0.0263***<br>(0.0041)  |
| BLL 8 × grade      |                        |                        | 0.0037**<br>(0.0013)   | -0.0015<br>(0.0014)    |
| BLL 9              | 0.0110**<br>(0.0036)   | 0.0257***<br>(0.0038)  | 0.0047<br>(0.0046)     | 0.0278***<br>(0.0050)  |
| BLL 9 × grade      |                        |                        | 0.0026<br>(0.0015)     | -0.0009<br>(0.0016)    |
| BLL 10             | 0.0143*<br>(0.0056)    | 0.0283***<br>(0.0060)  | 0.0054<br>(0.0077)     | 0.0350***<br>(0.0085)  |
| BLL 10 × grade     |                        |                        | 0.0033<br>(0.0027)     | -0.0027<br>(0.0027)    |
| Male               | -0.0026**<br>(0.0008)  | 0.0350***<br>(0.0008)  | -0.0175***<br>(0.0010) | 0.0393***<br>(0.0012)  |
| Male × grade       |                        |                        | 0.0070***<br>(0.0004)  | -0.0020***<br>(0.0004) |
| White              | -0.0106***<br>(0.0014) | -0.0519***<br>(0.0016) | -0.0229***<br>(0.0021) | -0.0701***<br>(0.0024) |
| White × grade      |                        |                        | 0.0060***<br>(0.0008)  | 0.0092***<br>(0.0009)  |
| Black              | 0.1190***<br>(0.0015)  | 0.0843***<br>(0.0017)  | 0.1143***<br>(0.0024)  | 0.0605***<br>(0.0026)  |
| Black × grade      |                        |                        | 0.0024*<br>(0.0009)    | 0.0116***<br>(0.0010)  |
| EconDisadv         | 0.0435***<br>(0.0009)  | 0.0591***<br>(0.0010)  | 0.0365***<br>(0.0014)  | 0.0575***<br>(0.0016)  |
| EconDisadv × grade |                        |                        | 0.0031***<br>(0.0005)  | 0.0007<br>(0.0005)     |
| Medicaid           | 0.0161***<br>(0.0010)  | 0.0224***<br>(0.0011)  | 0.0201***<br>(0.0013)  | 0.0189***<br>(0.0015)  |

|                                  |                       |                        |                       |                        |
|----------------------------------|-----------------------|------------------------|-----------------------|------------------------|
| Medicaid × grade                 |                       |                        | -0.0015**<br>(0.0005) | 0.0018***<br>(0.0005)  |
| Not Married                      | 0.0105***<br>(0.0011) | 0.0045***<br>(0.0012)  | 0.0044**<br>(0.0014)  | 0.0009<br>(0.0016)     |
| Not Married × grade              |                       |                        | 0.0029***<br>(0.0005) | 0.0017**<br>(0.0006)   |
| Used Alcohol                     | 0.0045<br>(0.0038)    | -0.0036<br>(0.0040)    | 0.0031<br>(0.0047)    | -0.0027<br>(0.0052)    |
| Used Alcohol × grade             |                       |                        | 0.0003<br>(0.0017)    | -0.0005<br>(0.0017)    |
| Smoked                           | 0.0104***<br>(0.0011) | 0.0050***<br>(0.0012)  | 0.0012<br>(0.0014)    | 0.0017<br>(0.0016)     |
| Smoked × grade                   |                       |                        | 0.0042***<br>(0.0005) | 0.0016**<br>(0.0006)   |
| Age in 3rd Grade                 | 0.1787***<br>(0.0010) | 0.1814***<br>(0.0011)  | 0.1593***<br>(0.0015) | 0.1764***<br>(0.0016)  |
| Age in 3rd Grade × grade         |                       |                        | 0.0090***<br>(0.0005) | 0.0024***<br>(0.0005)  |
| Mother 21-29 years               | 0.0173***<br>(0.0011) | 0.0257***<br>(0.0012)  | 0.0163***<br>(0.0014) | 0.0307***<br>(0.0016)  |
| Mother 21-29 years × grade       |                       |                        | 0.0005<br>(0.0005)    | -0.0023***<br>(0.0006) |
| Mother 30+ years                 | 0.0138***<br>(0.0013) | 0.0101***<br>(0.0014)  | 0.0165***<br>(0.0017) | 0.0173***<br>(0.0019)  |
| Mother 30+ years × grade         |                       |                        | -0.0012<br>(0.0006)   | -0.0034***<br>(0.0007) |
| Parents some high school         | 0.0044<br>(0.0025)    | -0.0280***<br>(0.0028) | 0.0001<br>(0.0032)    | -0.0357***<br>(0.0037) |
| Parents some high school × grade |                       |                        | 0.0019<br>(0.0011)    | 0.0039**<br>(0.0013)   |

|                                  |                        |                        |                        |                        |
|----------------------------------|------------------------|------------------------|------------------------|------------------------|
| Parents high school grad         | -0.0341***<br>(0.0024) | -0.0740***<br>(0.0027) | -0.0327***<br>(0.0031) | -0.0810***<br>(0.0036) |
| Parents high school grad × grade |                        |                        | -0.0007<br>(0.0012)    | 0.0037**<br>(0.0013)   |
| Parents some college             | -0.0807***<br>(0.0026) | -0.1274***<br>(0.0028) | -0.0756***<br>(0.0033) | -0.1315***<br>(0.0039) |
| Parents some college × grade     |                        |                        | -0.0023<br>(0.0012)    | 0.0024<br>(0.0014)     |
| Parents college grad             | -0.1245***<br>(0.0026) | -0.1821***<br>(0.0029) | -0.1135***<br>(0.0036) | -0.1848***<br>(0.0041) |
| Parents college grad × grade     |                        |                        | -0.0050***<br>(0.0014) | 0.0018<br>(0.0015)     |
| February Birthdate               | 0.0062**<br>(0.0019)   | 0.0091***<br>(0.0021)  | 0.0062***<br>(0.0016)  | 0.0091***<br>(0.0016)  |
| March Birthdate                  | 0.0061**<br>(0.0019)   | 0.0121***<br>(0.0020)  | 0.0060***<br>(0.0016)  | 0.0121***<br>(0.0016)  |
| April Birthdate                  | 0.0088***<br>(0.0019)  | 0.0176***<br>(0.0020)  | 0.0087***<br>(0.0015)  | 0.0175***<br>(0.0017)  |
| May Birthdate                    | 0.0075***<br>(0.0019)  | 0.0165***<br>(0.0020)  | 0.0075***<br>(0.0015)  | 0.0165***<br>(0.0017)  |
| June Birthdate                   | 0.0069***<br>(0.0019)  | 0.0169***<br>(0.0020)  | 0.0069***<br>(0.0016)  | 0.0169***<br>(0.0017)  |
| July Birthdate                   | 0.0062***<br>(0.0018)  | 0.0172***<br>(0.0020)  | 0.0061***<br>(0.0016)  | 0.0172***<br>(0.0017)  |
| August Birthdate                 | -0.0000<br>(0.0018)    | 0.0126***<br>(0.0020)  | -0.0001<br>(0.0016)    | 0.0125***<br>(0.0017)  |
| September Birthdate              | -0.0061**<br>(0.0019)  | 0.0062**<br>(0.0020)   | -0.0062***<br>(0.0016) | 0.0062***<br>(0.0018)  |
| October Birthdate                | -0.0894***<br>(0.0020) | -0.0855***<br>(0.0022) | -0.0894***<br>(0.0018) | -0.0855***<br>(0.0018) |

|                    |                        |                        |                        |                        |
|--------------------|------------------------|------------------------|------------------------|------------------------|
| November Birthdate | -0.1753***<br>(0.0021) | -0.1833***<br>(0.0023) | -0.1751***<br>(0.0020) | -0.1833***<br>(0.0021) |
| December Birthdate | -0.1767***<br>(0.0021) | -0.1805***<br>(0.0023) | -0.1766***<br>(0.0020) | -0.1806***<br>(0.0020) |
| Constant           | -1.2884***<br>(0.0087) | -1.2270***<br>(0.0093) | -1.2896***<br>(0.0106) | -1.2303***<br>(0.0106) |
| N                  | 2,344,358              | 2,344,358              | 2,344,358              | 2,344,358              |
| R2                 | 0.245                  | 0.251                  | 0.246                  | 0.251                  |

---

The omitted categories for the categorical explanatory variables correspond to BLL = 1, female, all other races/ethnicities, not economically disadvantaged, not on Medicaid, mother married at the time of birth, mother did not use alcohol during pregnancy, mother did not smoke during pregnancy, mother less than 21 years old at the time of birth, and parents had no high school education as of the time of child's birth. All estimates are from regression models that include school-grade-year dummy variables. Robust standard errors clustered at the student level are presented in parentheses. \*\*\* indicates the corresponding coefficient is significantly different from zero at the 0.1% level; \*\* indicates the corresponding coefficient is significantly different from zero at the 1% level; and \* indicates the corresponding coefficient is significantly different from zero at the 5% level.
